# Supplementary material for: Inoculation with Biofilm of Bacillus subtilis Is a Safe and Sustainable Alternative to Promote Tomato (Solanum lycopersicum) Growth
Source: MDPI journal article supplement (doi:10.3390/environments11030054), 2024-03-11
Supplement: s1 [file s1]

## Supplementary Materials

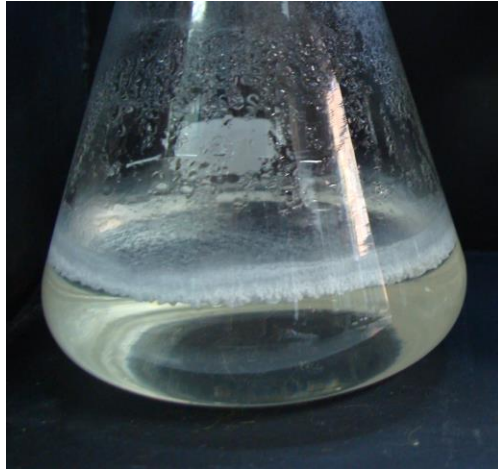

**Figure S1.** Biofilm from *B. subtilis* subsp. *spizizenii* at the air-liquid interface. (Cultivation in minimum salt medium (MSM) plus 55 mM glutamic acid and 1% glycerol under static conditions at a 30 °C for 96 h).

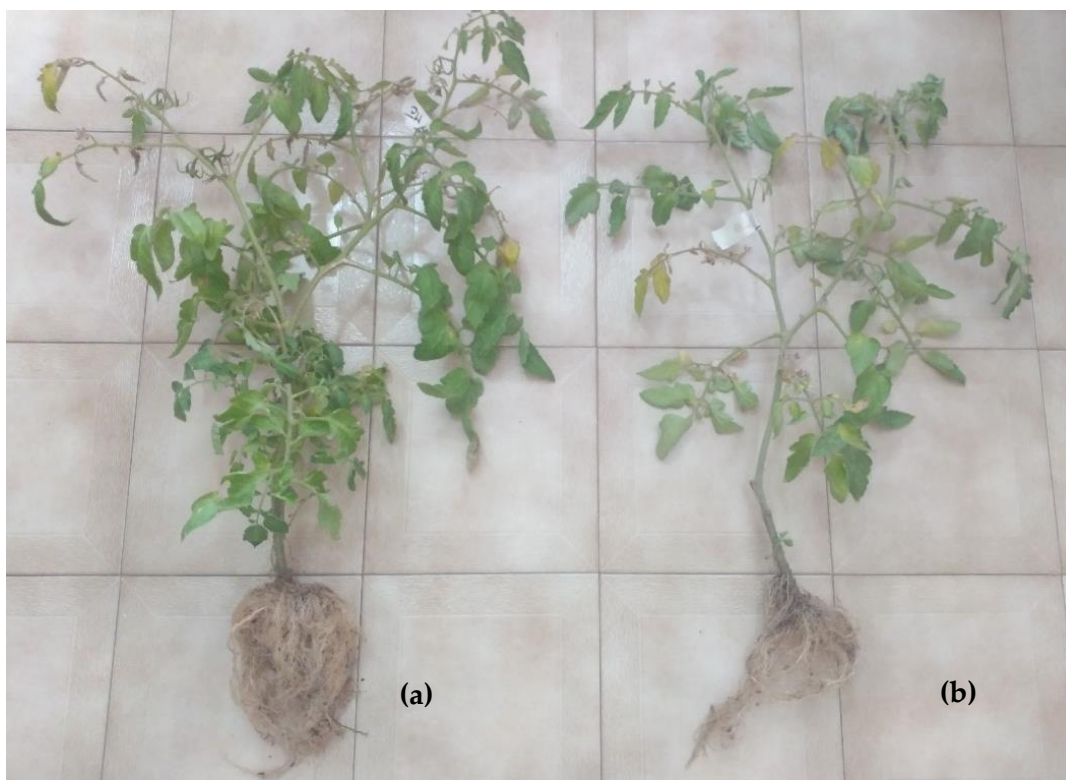

**Figure S2.** *S. lycopersicum* plants, Río Grande variety, at harvest time (4 months). (a) planktonic. inoculum treatment, (b) non inoculated treatment.

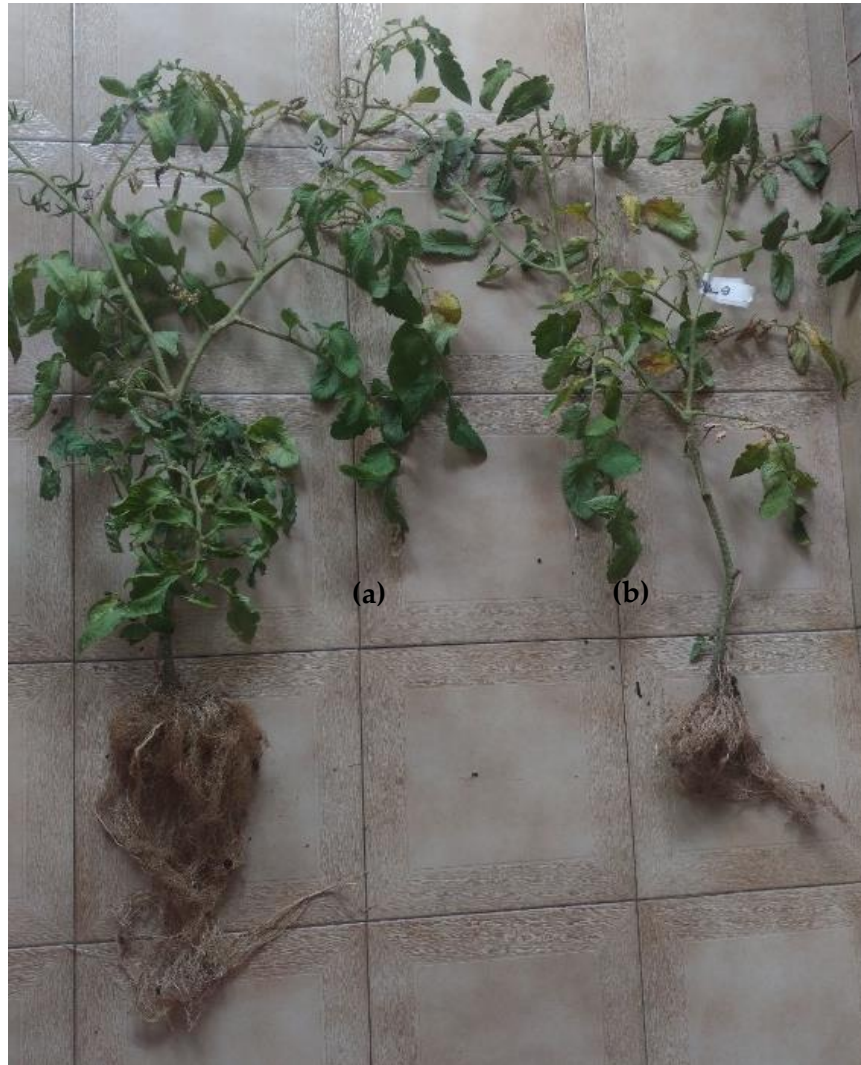

**Figure S3.** *S. lycopersicum* plants, Río Grande variety, at harvest time (4 months). (a) biofilm treatment, (b) non inoculated treatment.

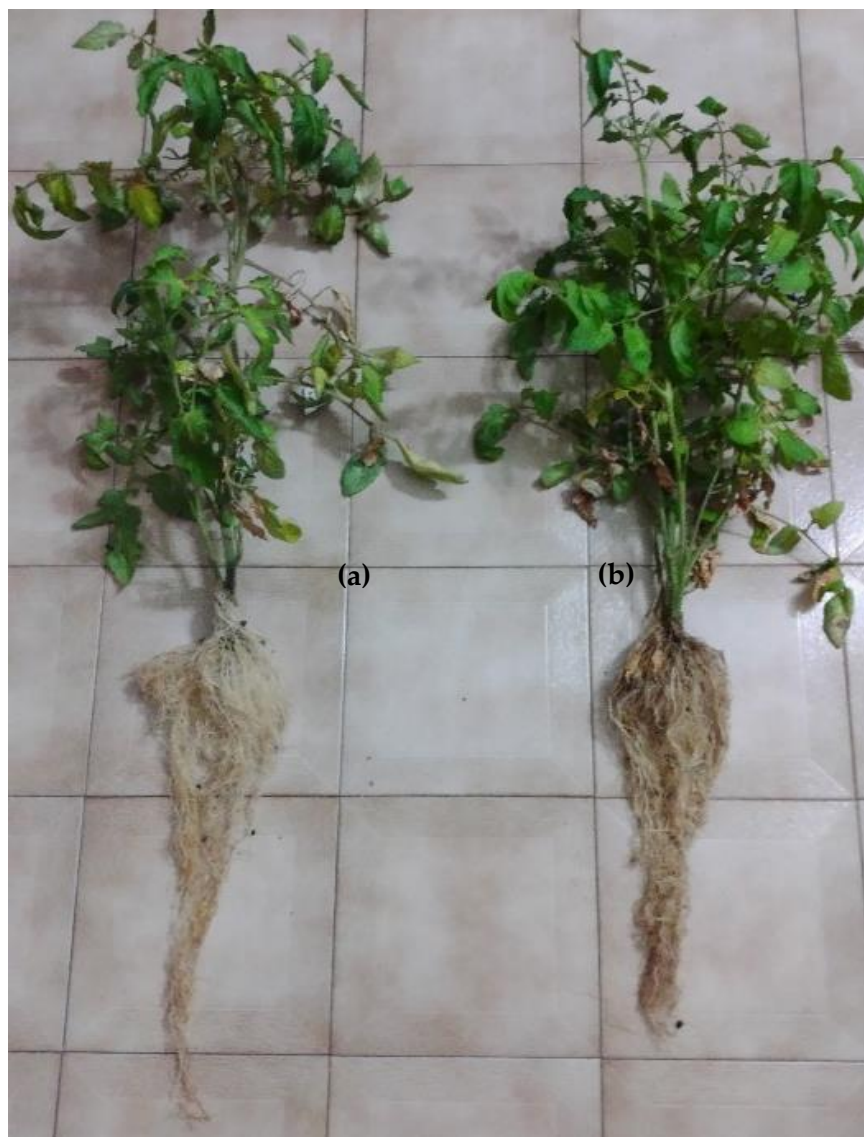

**Figure S4.** *S. lycopersicum* plants, Río Grande variety, at harvest time (4 months). (a) planktonic inoculum treatment, (b) biofilm treatment.
